# Supplementary material for: Histone Deacetylase Complex 1 and histone 1 epigenetically moderate stress responsiveness of Arabidopsis thaliana seedlings
Source: PubMed Central journal article supplement (PMC10953426; doi:10.1111/nph.19165), 2023-08-10
Supplement: NPH-241-166-s001.pdf [file NPH-241-166-s001.pdf]

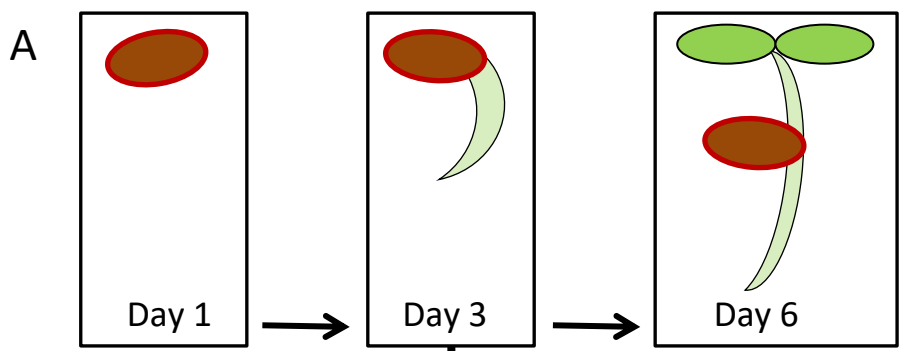

No visible phenotype

mRNA-Seq

| Genotype      | Treatment   |
|---------------|-------------|
| <i>HDC1c</i>  | Control     |
| <i>RXT3</i>   | 100 mM NaCl |
| <i>hdc1-1</i> |             |

**B**

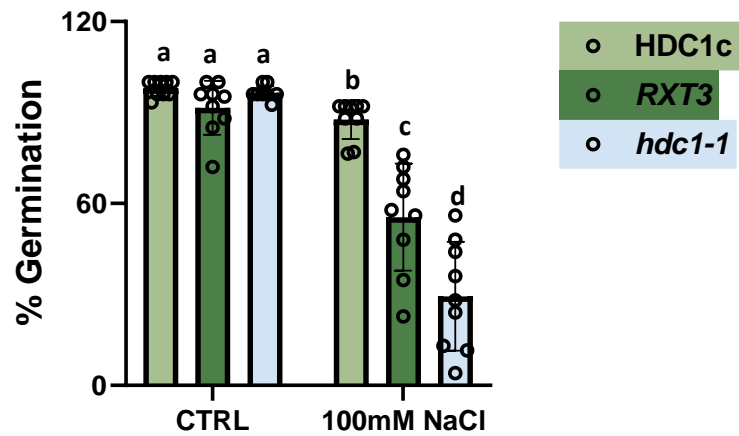

**C**

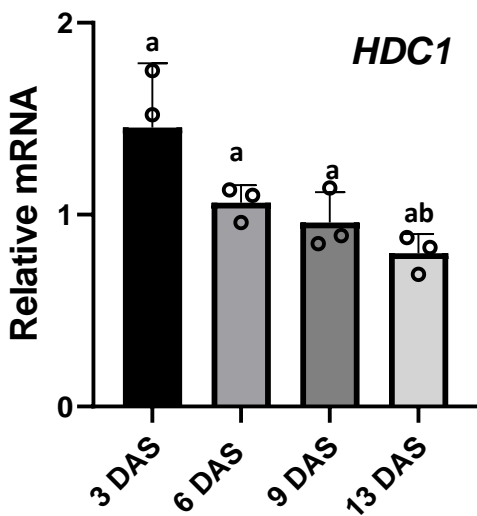

**Fig. S1** Schematic representation of the experimental set up for RNA-seq or ChIP-seq sampling. **(A)** Seedlings from *HDC1c* (*HDC1* complemented *hdc1-1* mutant), *hdc1-1* mutant and *hdc1-1* mutant over expressing *RXT3* (*RXT3*) motif were harvested at day 3 after sowing. **(B)** At day 6 seedlings for each genotype were scored for germination under control (1/2 MS medium with sucrose) and salt conditions (1/2 MS medium with sucrose supplemented with 100 mM NaCl). Percentage of established seedlings was scored in independent experiments with  $\geq 50$  seedlings per experiment on day 6 after sowing on control media and media supplemented with 100 mM NaCl. **(C)** *HDC1* mRNA levels in wild type seedlings at 3-6-9-13 Days After Sowing (DAS) in 100 mM NaCl. Expression was normalised to those in control conditions. Bars are means of  $n \geq 3$  experiments (reported above the bars)  $\pm$  SD. Letters indicate differences at  $p < 0.05$  (one-way ANOVA). For all the experiments seedlings were grown in constant white light ( $75 \text{ mmol m}^{-2} \text{ s}^{-1}$ ).

# HDC1c salt/control

A

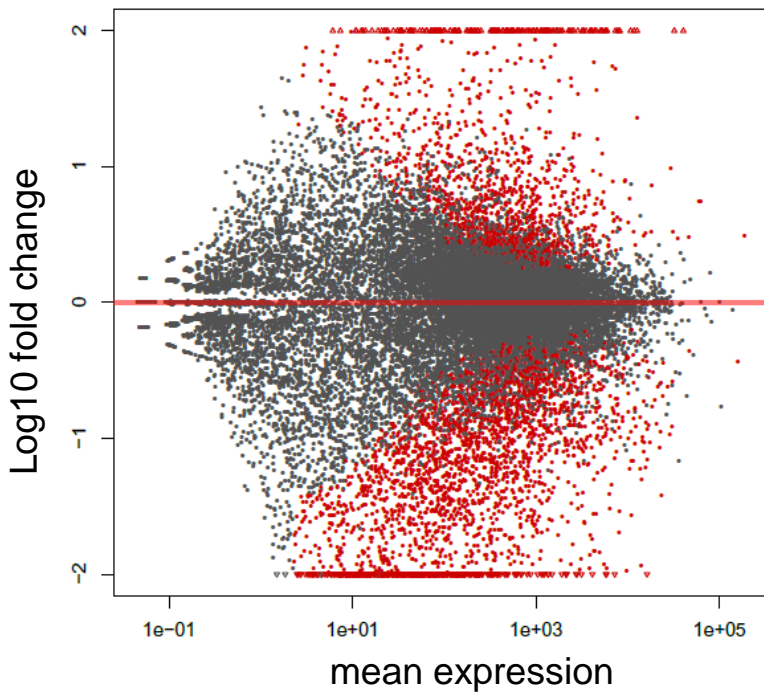

B

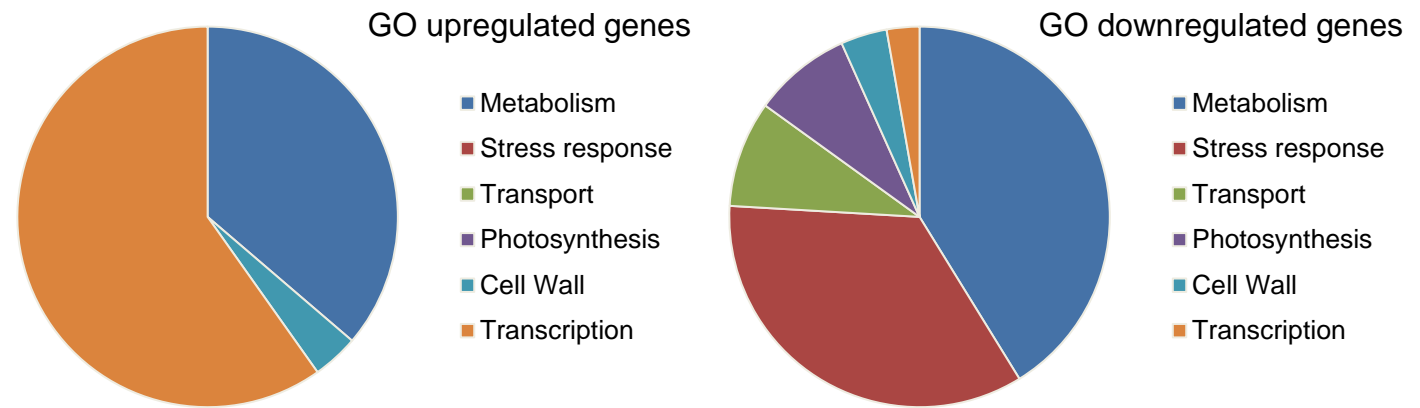

**Fig. S2.** (A) MA plot to visualize differentially expressed genes in the described genotypes and conditions. Red dots indicate genes whose expression changes by log10 and mean average. (B) Gene ontology analysis of down and upregulated genes identified by RNAseq with a p-value  $\leq 0.05$ .

### RXT3 salt/control

A

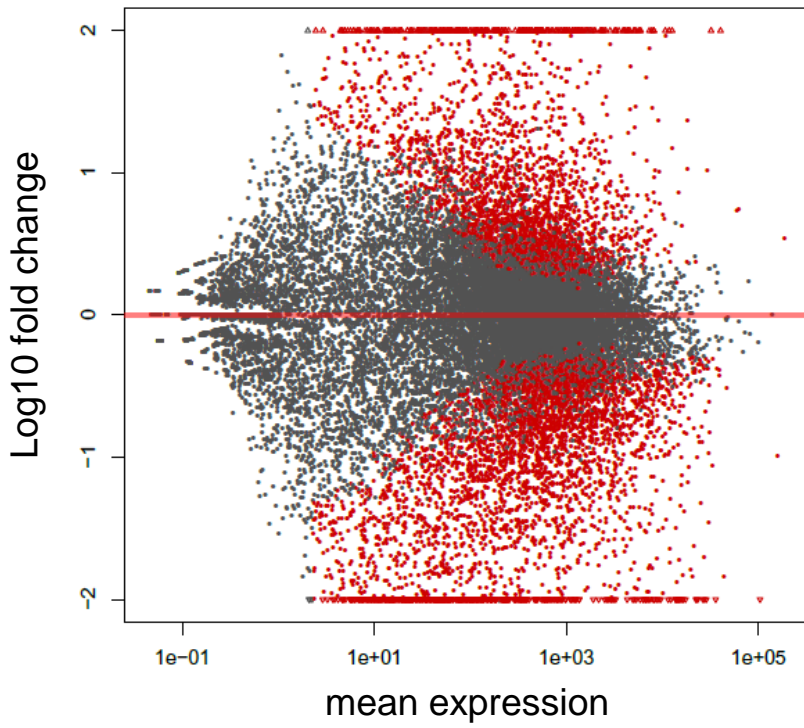

B

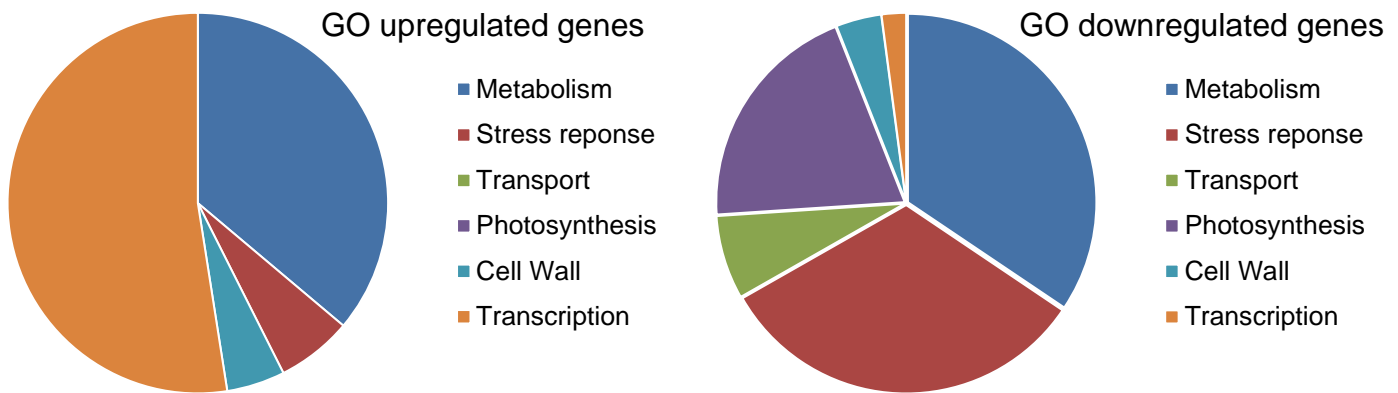

**Fig. S3 (A)** MA plot to visualize differentially expressed genes in the described genotypes and conditions. Red dots indicate genes whose expression changes by log<sub>10</sub> and mean average. **(B)** Gene ontology analysis of down and upregulated genes identified by RNAseq with a p-value  $\leq 0.05$ .

**A** *hdc1-1* salt/control

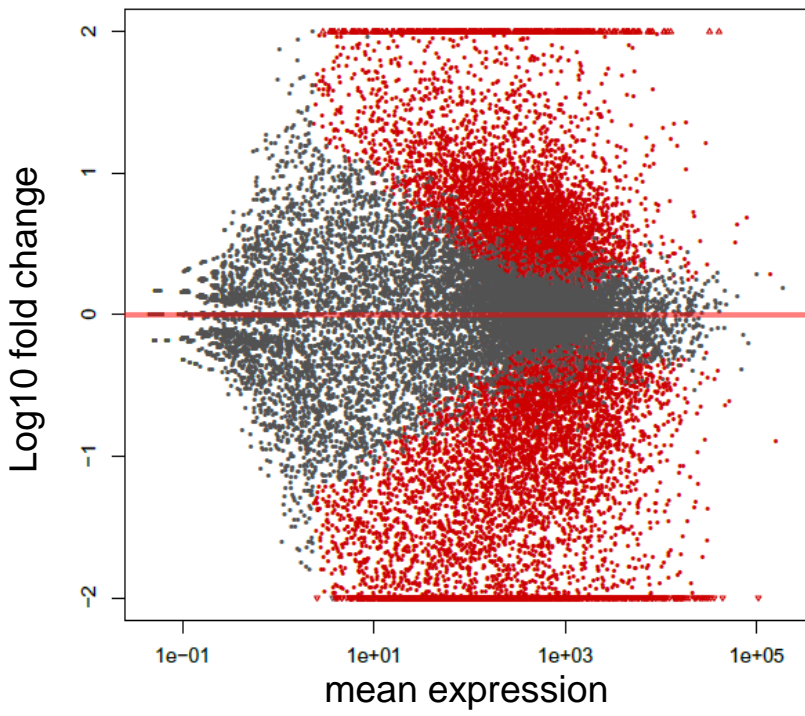

**B**

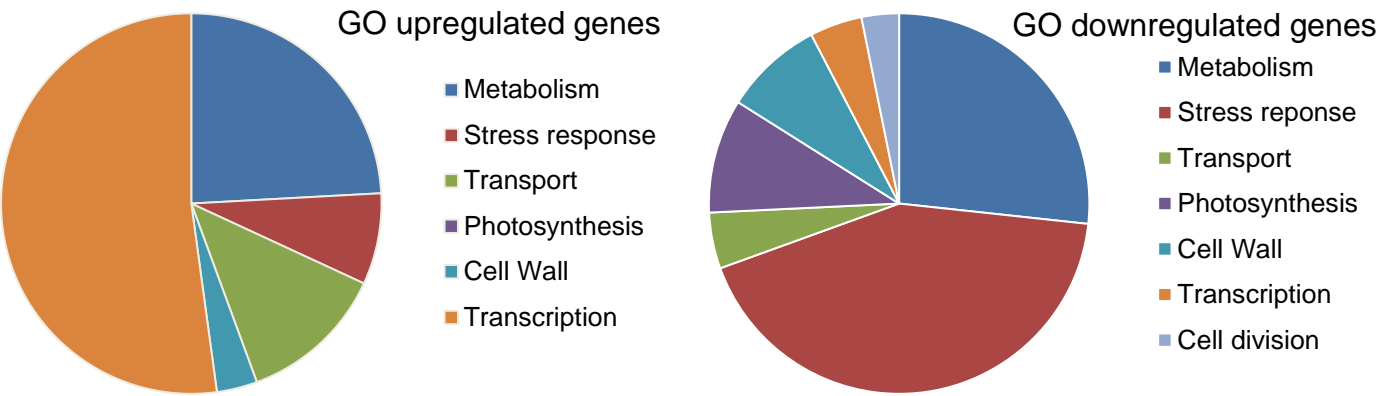

**Fig. S4 (A)** MA plot to visualize differentially expressed genes in the described genotypes and conditions. Red dots indicate genes whose expression changes by log<sub>10</sub> and mean average. **(B)** Gene ontology analysis of down and upregulated genes identified by RNAseq with a p-value  $\leq 0.05$ .

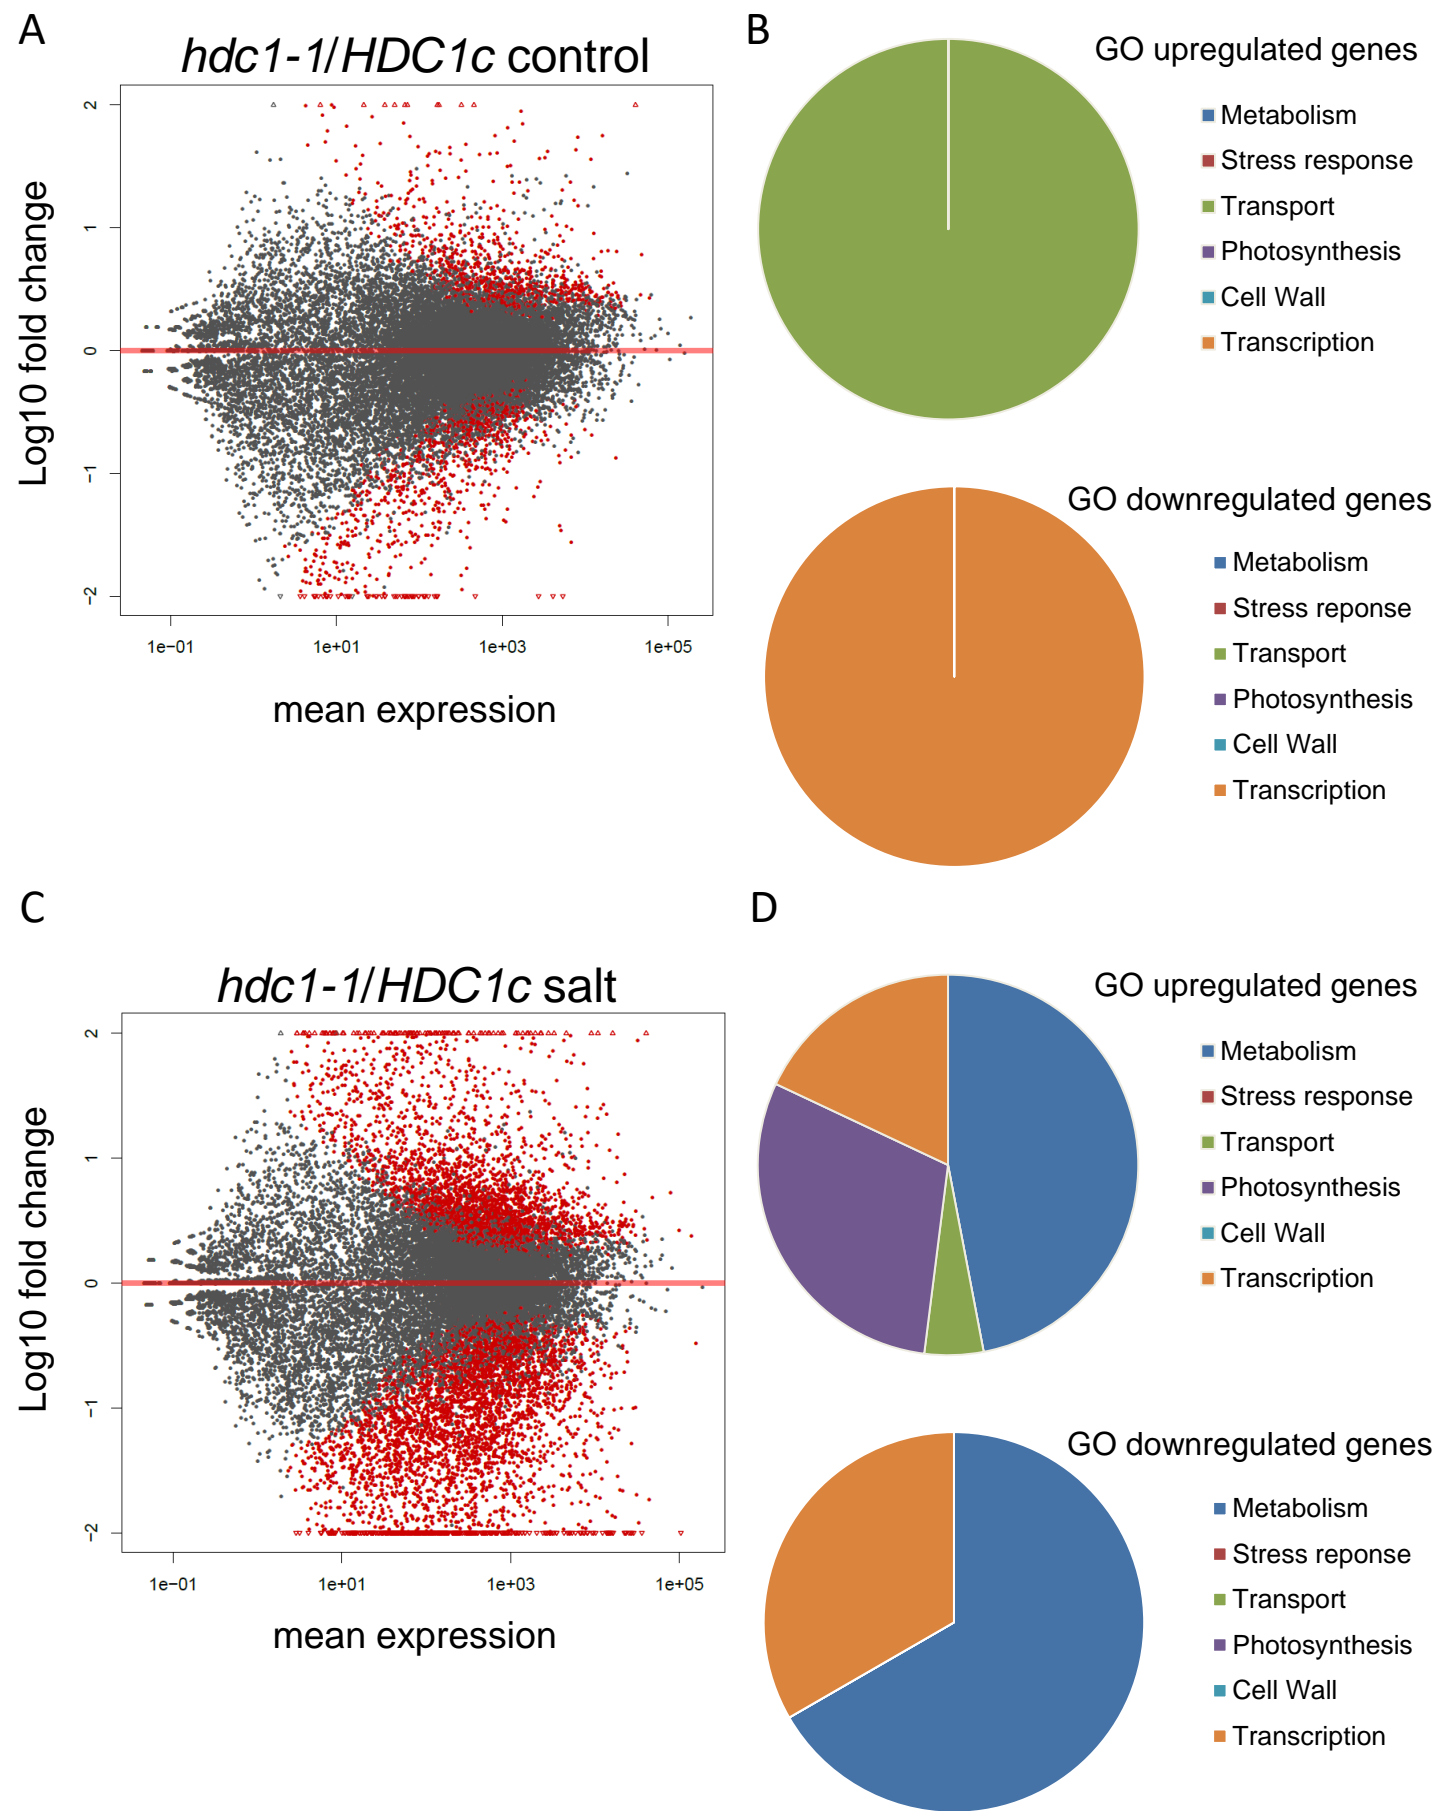

**Fig. S5.** (A-C) MA plot to visualize differentially expressed genes in the described genotypes and conditions. Red dots indicate genes whose expression changes by log<sub>10</sub> and mean average. (B-D) Gene ontology analysis of down and upregulated genes identified by RNAseq with a p-value  $\leq 0.05$ .

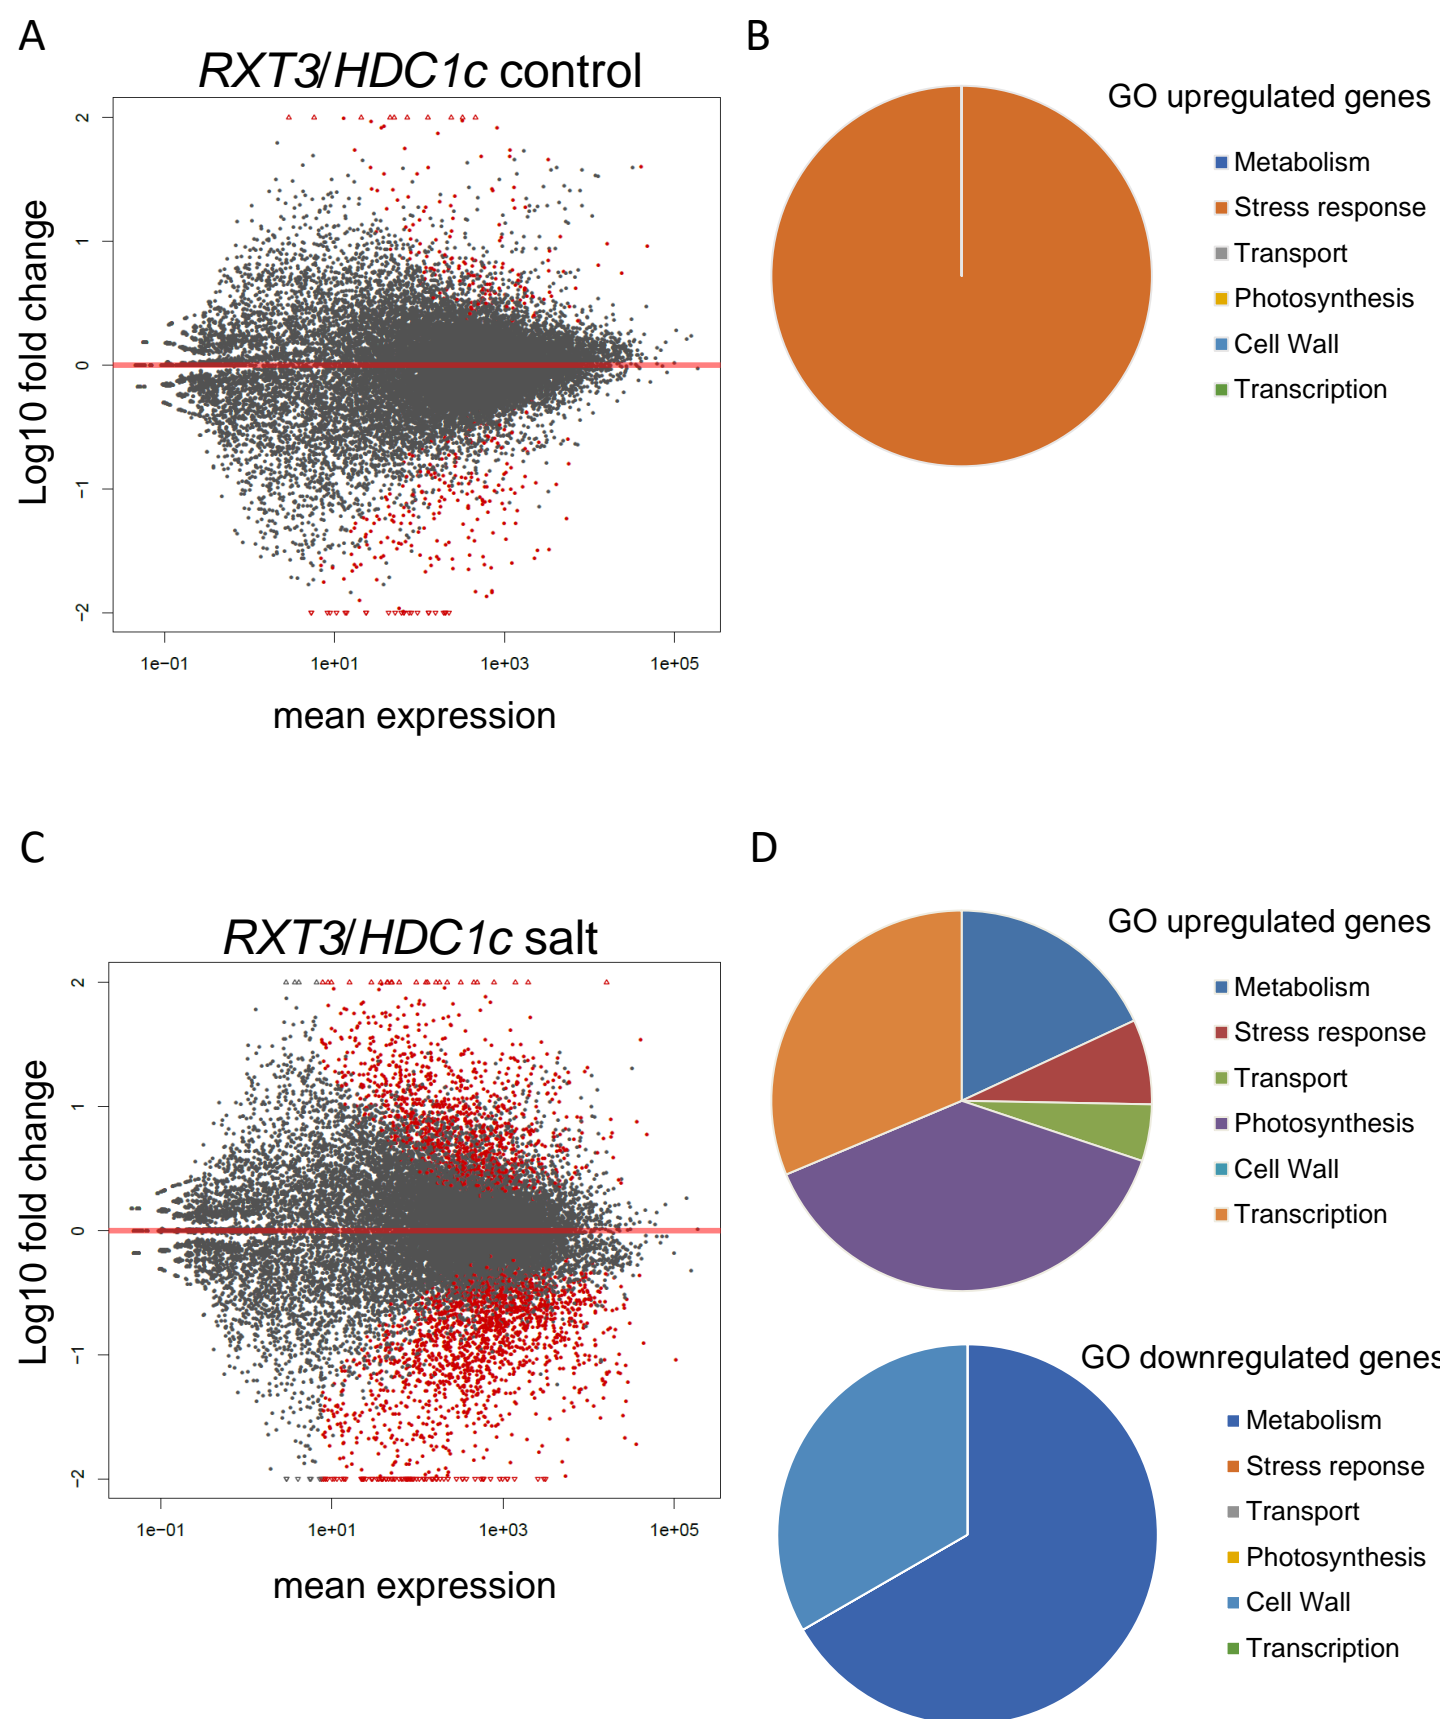

**Fig. S6.** (A-C) MA plot to visualize differentially expressed genes in the described genotypes and conditions. Red dots indicate genes whose expression changes by log<sub>10</sub> and mean average. (B-D) Gene ontology analysis of down and upregulated genes identified by RNAseq with a p-value  $\leq 0.05$ .

A

*RXT3/hdc1-1* control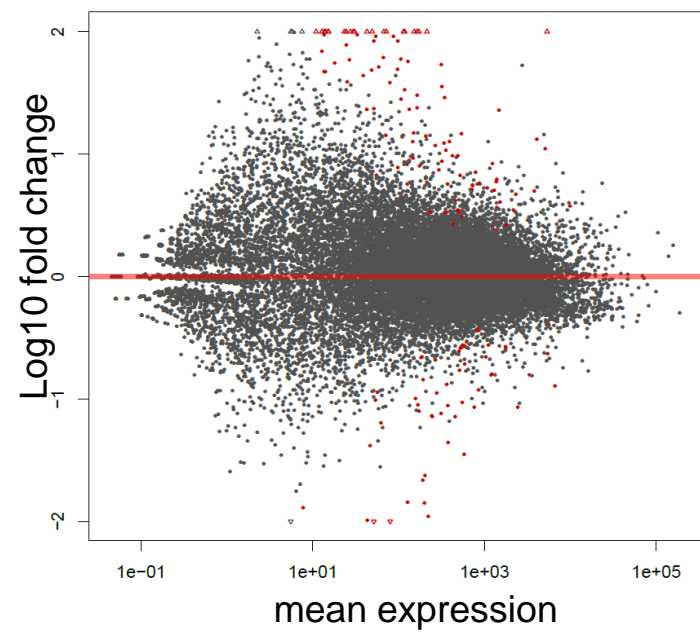

B

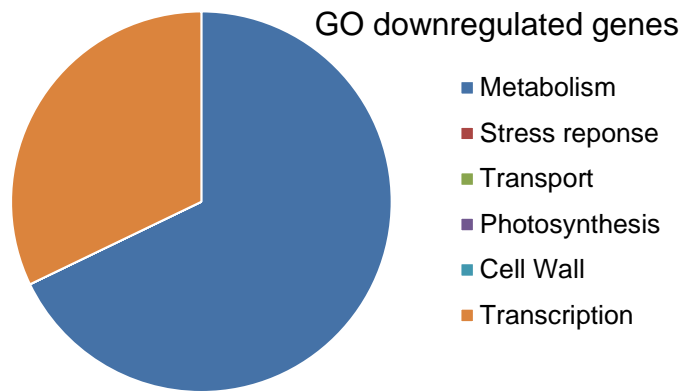

C

*RXT3/hdc1-1* salt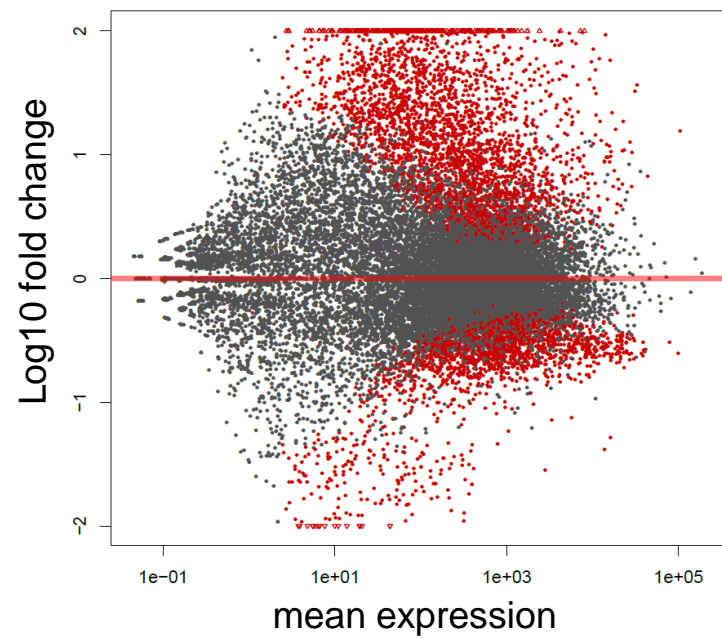

D

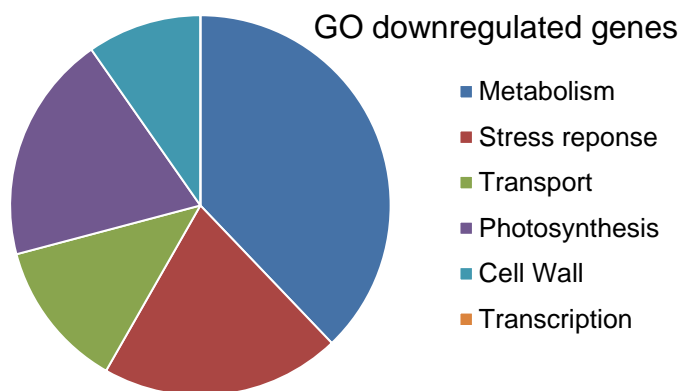DRGs *hdc1-1* vs *HDC1c*

E

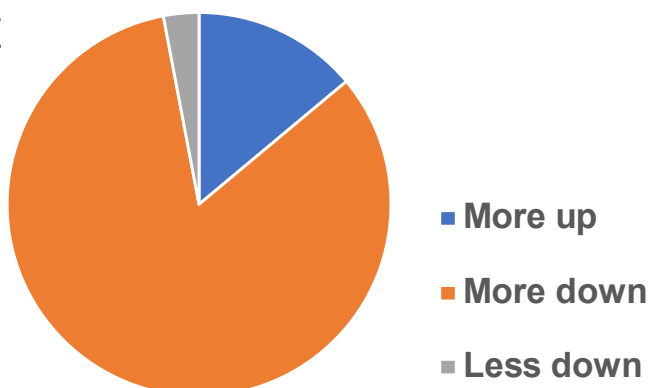

F

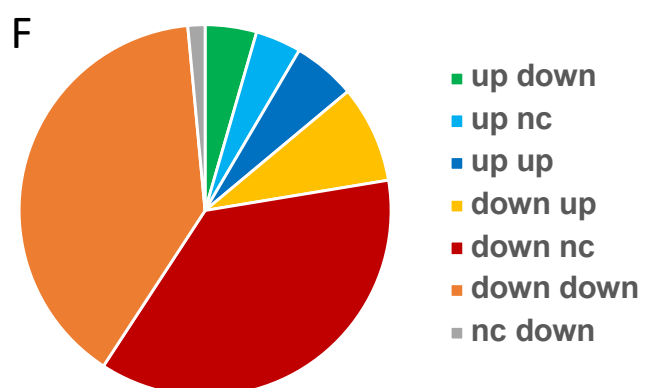

**Fig. S7.** (A-C) MA plot to visualize differentially expressed genes in the described genotypes and conditions. Red dots indicate genes whose expression changes by log<sub>10</sub> and mean average. (B-D) Gene ontology analysis of down and upregulated genes identified by RNAseq with a p-value ≤ 0,05. (E-F) Differential Responsive Genes (DRGs) between *hdc1-1* and *HDC1c* in response to 100 mM NaCl.

A

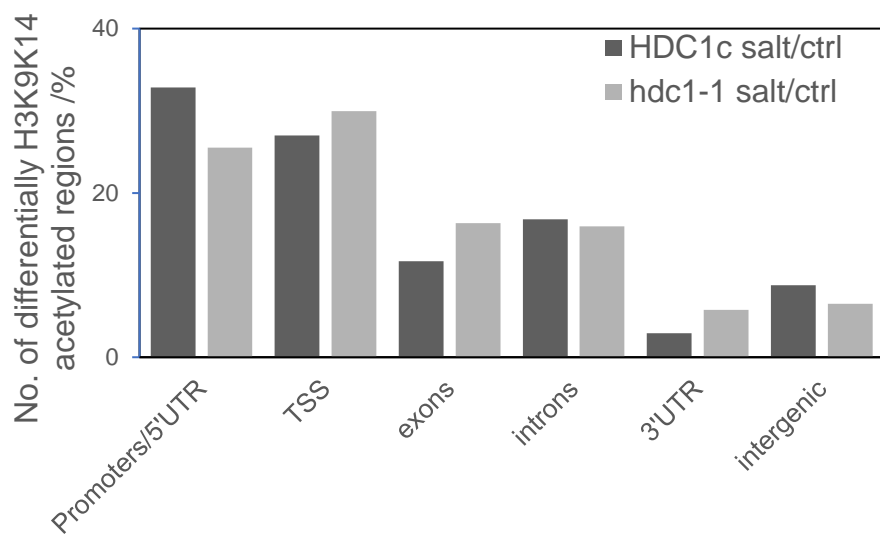

B

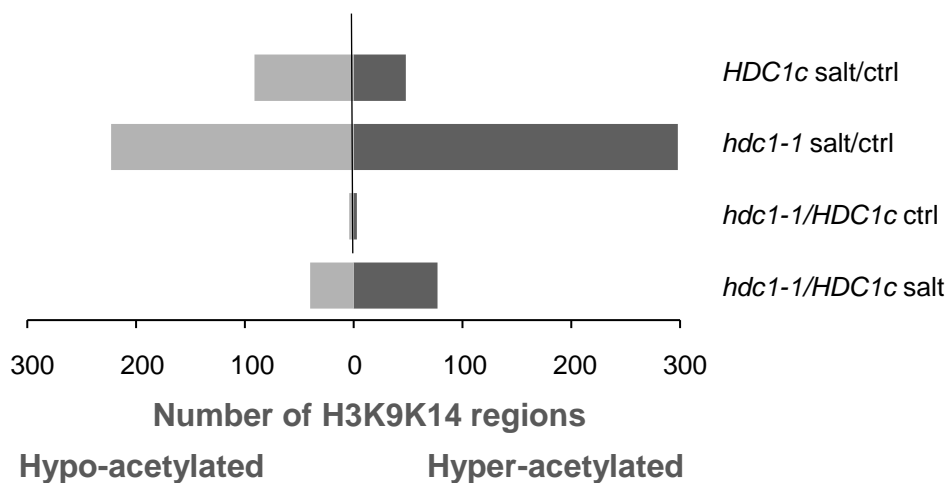

C

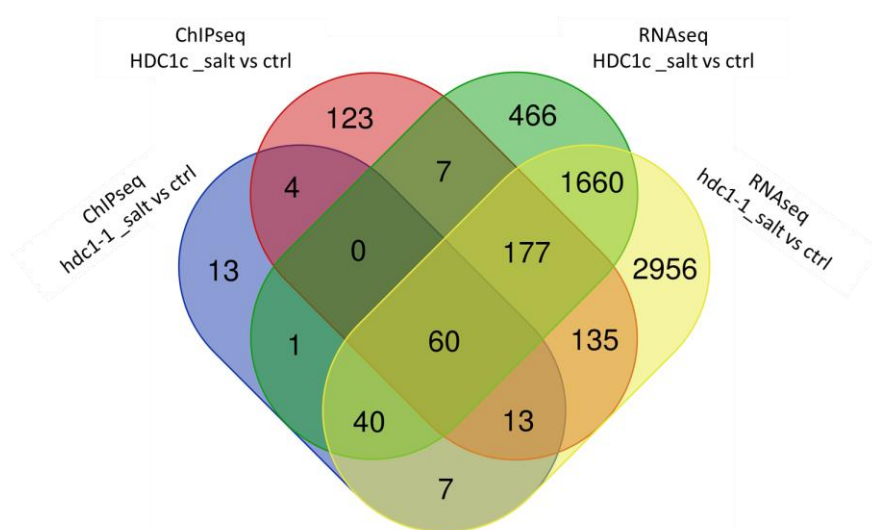

**Fig. S8 *HDC1* reduces differential histone acetylation in response to salt.**

(A) Number of Differentially Acetylated H3K9K14 Regions (DARs) (salt/control  $\geq 1.5$  fold) in different parts of the genome in *HDC1c* and *hdc1-1* (in % of all H3K9K14 regions). DARs were primarily located in transcription start site (TSS) regions and upstream gene. (B) Summary of the number of regions with more (hyper-acetylated, right) or less (hypo-acetylated, left) acetylated H3K9K14 comparing treatments (salt/control) or genotypes (*HDC1c*/*hdc1-1*) as indicated. Using  $\geq 1.5$  fold as cut-off, 7 DARs were identified in control conditions between *hdc1-1* and *HDC1c*. For seedlings grown on salt the number of *hdc1-1*/*HDC1c* was 117. In addition, the number of salt/control DARs was 521 in *hdc1-1* and 139 in *HDC1c*. (C) Venn diagrams depicting the number of common and unique differentially expressed targets (salt/control) between RNAseq and ChIPseq datasets for *HDC1c* and *hdc1-1*.



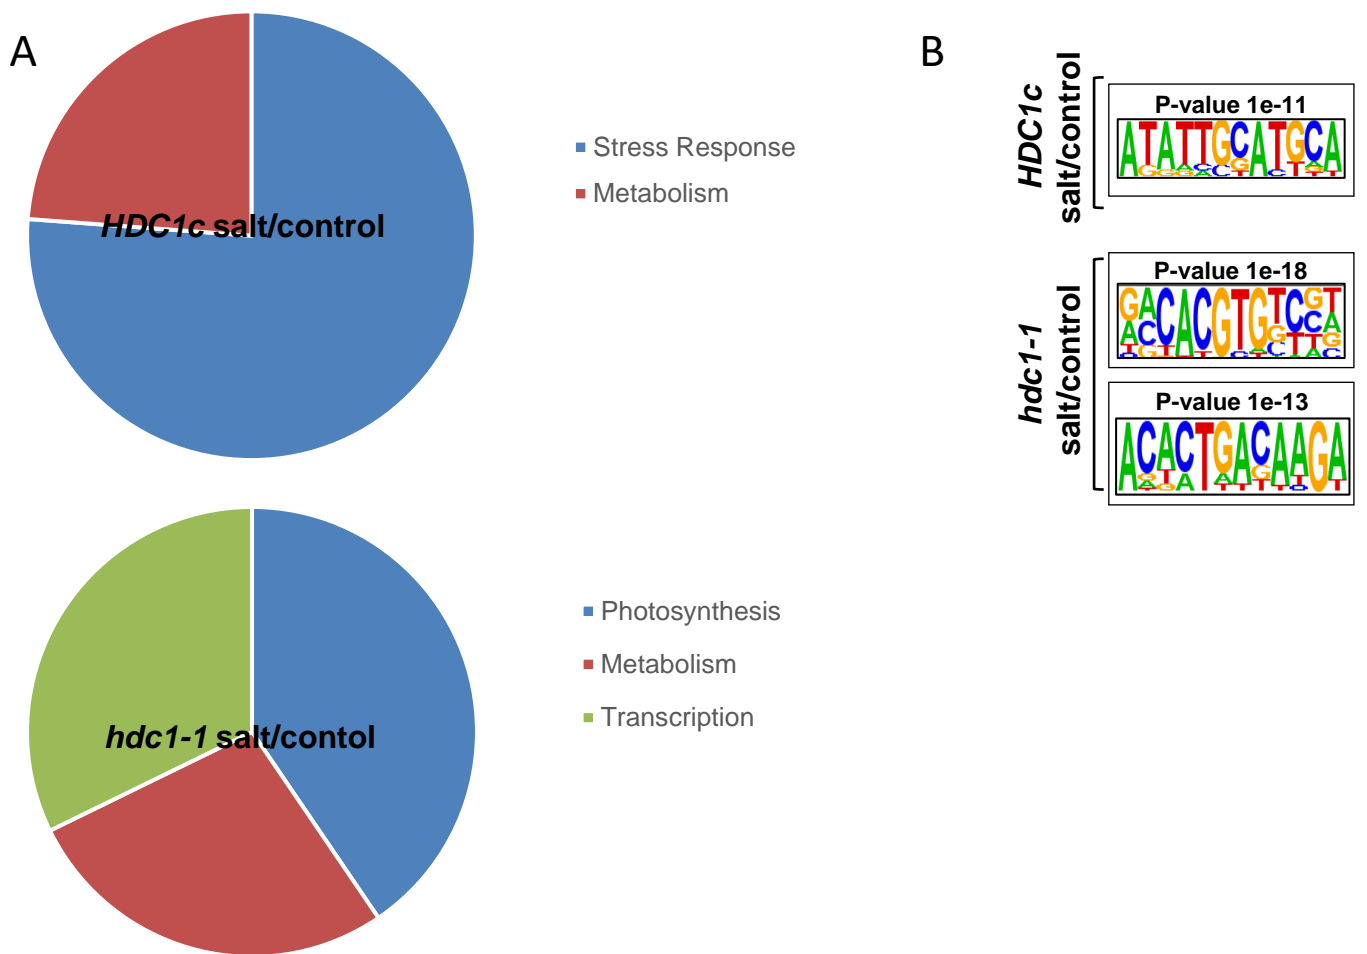

**Fig. S9. (A)** Gene ontology analysis of the ChIP targets identified in *HDC1c* and *hdc1-1* salt over control conditions (salt/control). Gene ontology analysis of the salt/control DARs in *HDC1c* showed enrichment for ABA-responsive proteins, calcium binding proteins, members of LEA family, annexins, ABRE-elements containing genes and cell-wall modifying enzymes such as xyloglucan endotransglucosylase/hydrolases (XTHs). The salt/control DARs in *hdc1-1* were enriched for transcription factors including DREB2A, AIL7, DBPF4, C2H2 and CCCH zinc finger protein members, as well as HD-ZIP leucine zipper proteins and NAC DOMAIN CONTAINING PROTEINS. **(B)** Enrichment for *de novo* motifs identified by Homer within promoter and TSS regions of differentially acetylated targets in *HDC1c* and *hdc1-1* salt over control (salt/control) comparisons. Analysis of consensus motifs enriched within promoter-localised salt/control DARs in *HDC1c* identified over-representation of the Ry-motif CATGCA(TG) that is present in many seed specific promoters (Mönke et al., 2004). For *hdc1-1* it was revealed an over-representation of the canonical G-box (CACGTG), a variation of an E-box and W-box (TGACA) motif which serves as a binding site for the members of the stress-induced WRKY transcription factor family (Ezer et al., 2017; Dhatteerwal et al., 2019).

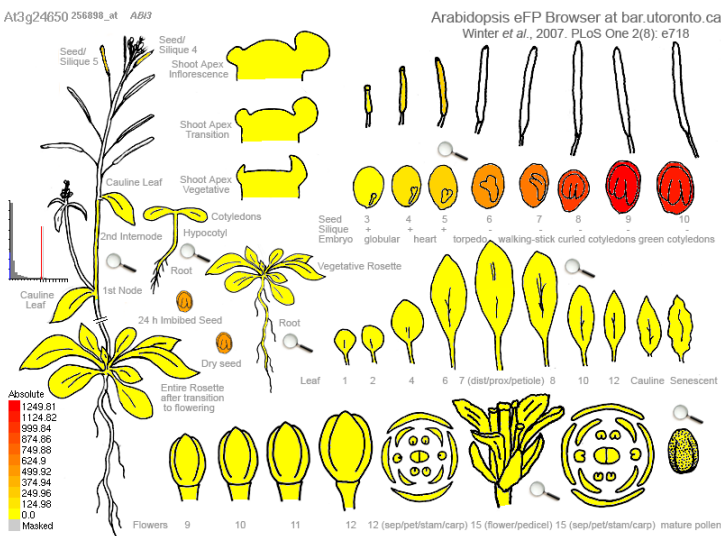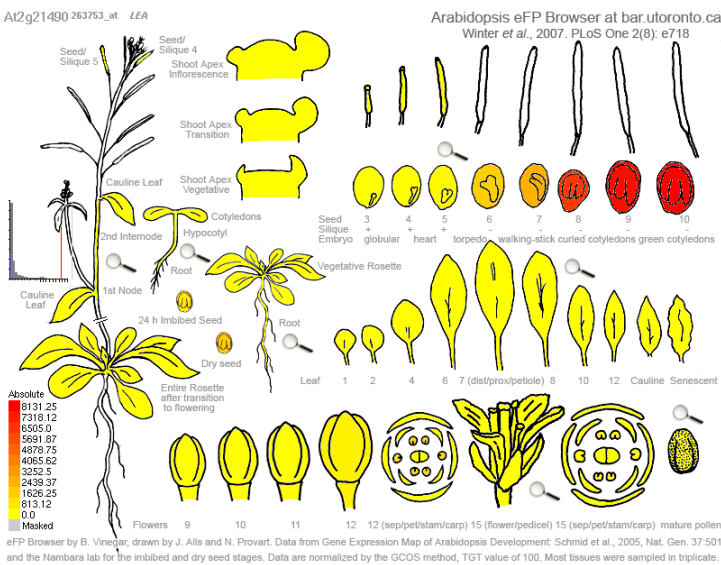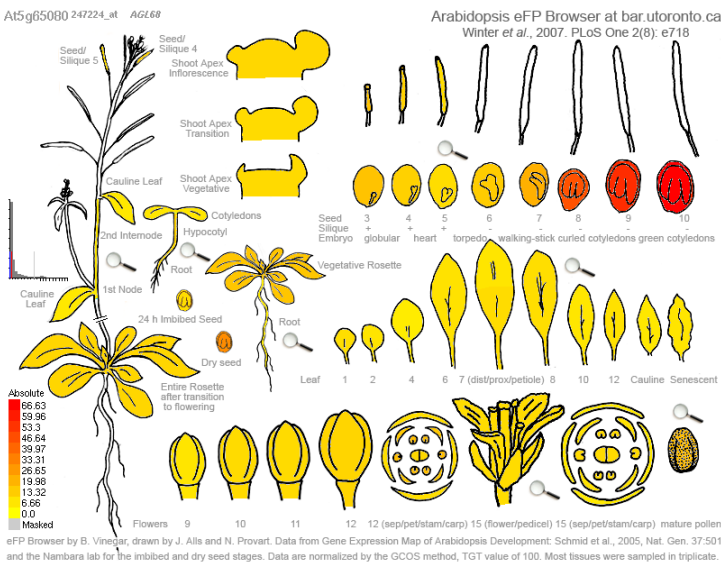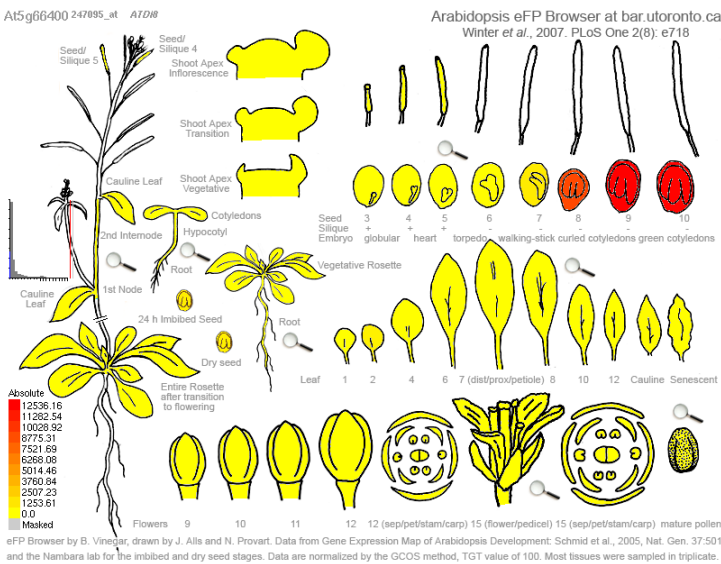

**Fig. S10** Developmental expression levels of *ABI3*, *LEA*, *MAF5* and *RAB18* as recorded by the EFP browser (Winter et al., 2007; <https://bar.utoronto.ca/efp/cgi-bin/efpWeb.cgi>)

A

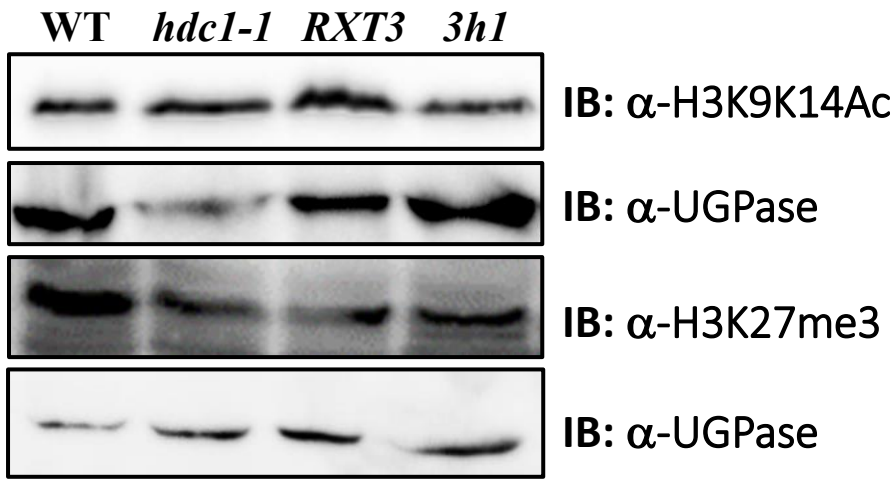

B

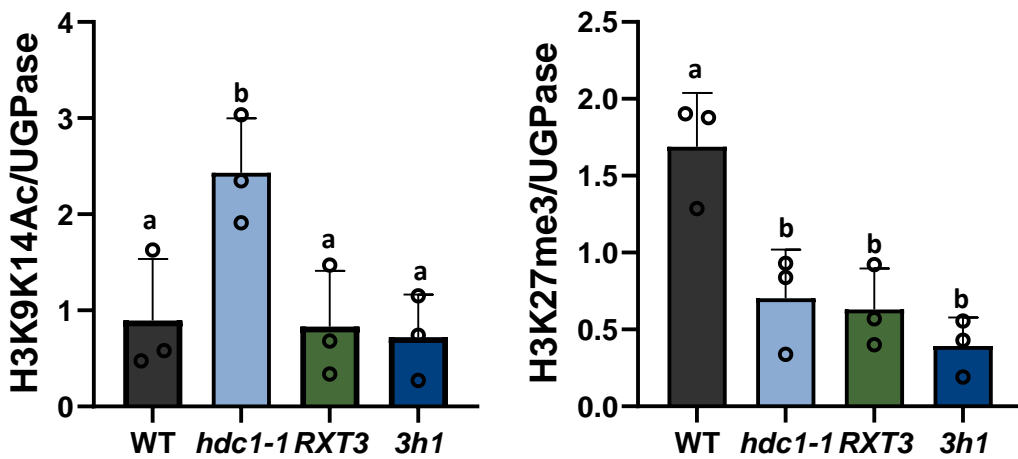

**Fig. S11 (A)** Detection of acetylated (a-H3K9K14Ac) (top) and methylated (H3K27me3) (bottom) histone 3 (a-H3) in protein extracts of wild type, *hdc1-1* mutant, *hdc1-1* overexpressing RXT3 domain (*RXT3*) and *3h1* mutant. For histone extraction three days old seedlings were grown on control plates (1/2 MS medium and 1% sucrose) supplemented with 100 mM NaCl. For all the experiments  $\sim$ 150 seedlings were grown in constant white light ( $75 \text{ mmol m}^{-2} \text{ s}^{-1}$ ). Anti-UGPase was used as loading control. **(B)** Quantification of acetylated and methylated histone levels in wild type, *hdc1-1* mutant, *hdc1-1* overexpressing RXT3 domain (*RXT3*) and *3h1* mutant seedlings grown as above-reported. Bars are means of 3 experiments  $\pm$  SD (reported above the bars). Letters indicate differences at  $p < 0.05$  (one-way ANOVA).

A

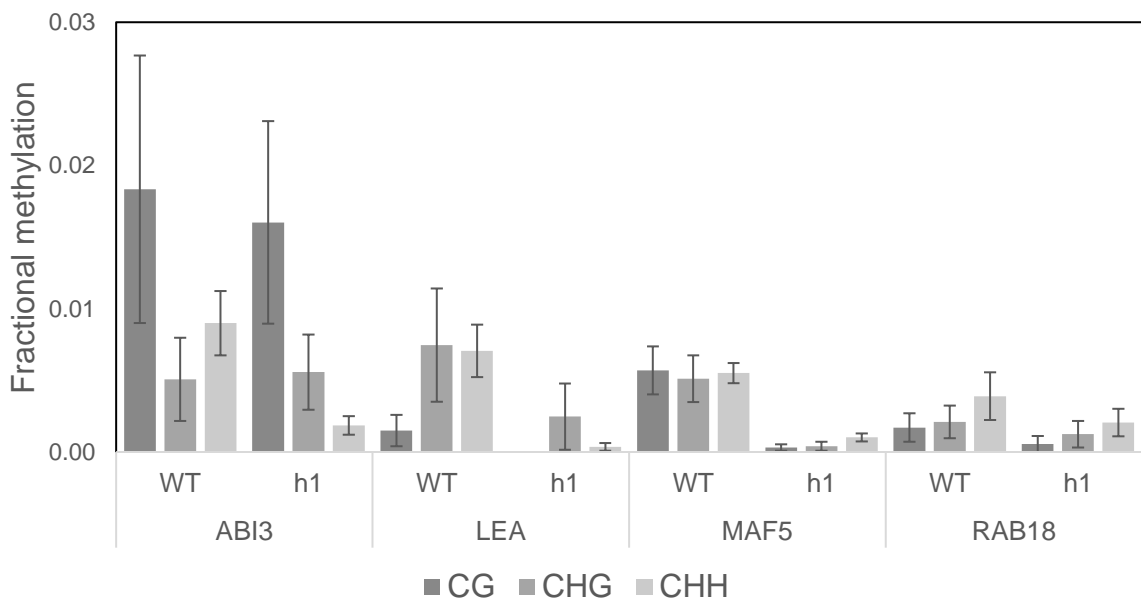

B

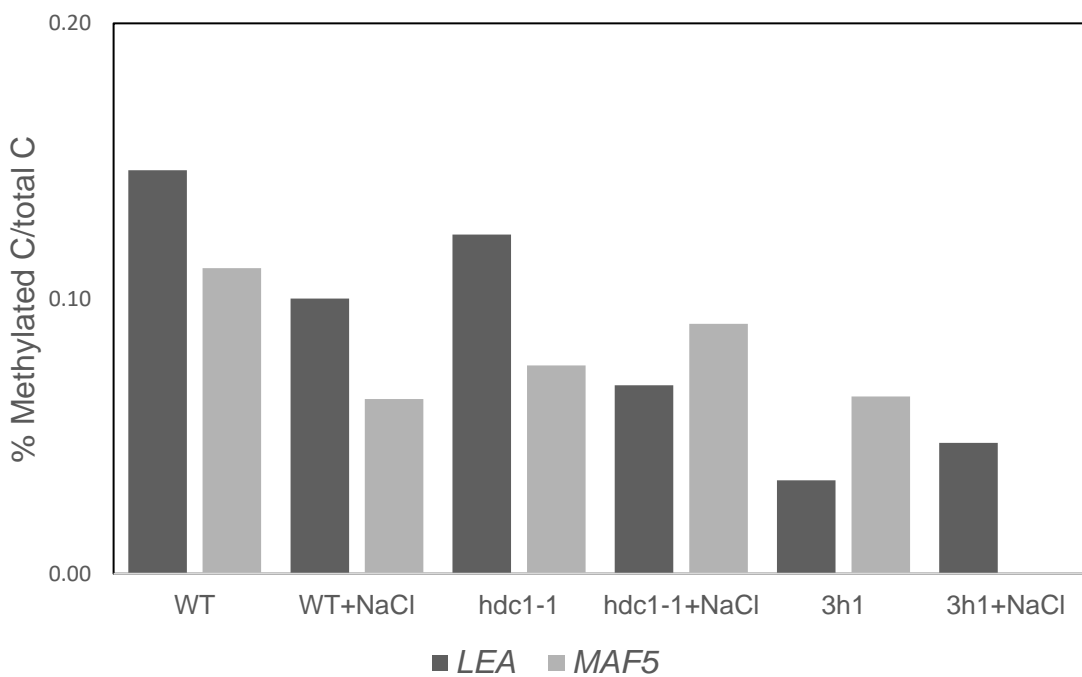

**Fig. S12 (A)** DNA methylation distribution across *ABI3*, *LEA*, *MAF5* and *RAB18* loci expressed in fractional methylation [ $\#C/(\#C+\#T)$ ] in wild type and *h1* mutant based on Bisulfite sequencing published in Zemach et al., 2013 (Note: the *h1* line in this publication is a *h1.1/h1.2* double mutant). Bars are means  $\pm$  SD. **(B)** Percentage of methylated cytosines (C) of *LEA* and *MAF5* DNA regions spanning promoters and TSS in wild type, *hdc1-1* and *3h1* mutants of seedlings grown on control plates (1/2 MS medium) and control plates supplemented with 100 mM NaCl. For all the experiments  $\sim$ 150 seedlings were grown in constant white light ( $75 \text{ mmol m}^{-2} \text{ s}^{-1}$ ) and samples were harvested at day 3. A minimum of five to eight clones per genotype and per treatment were sequenced.

A

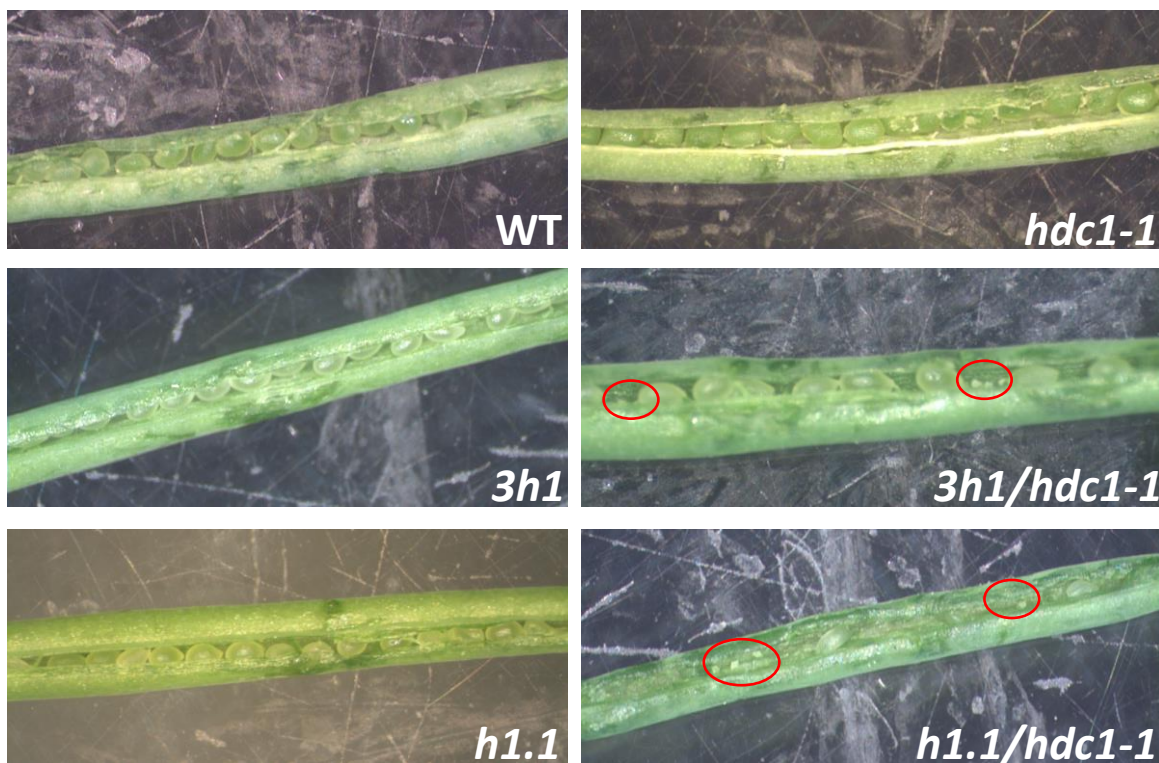

B

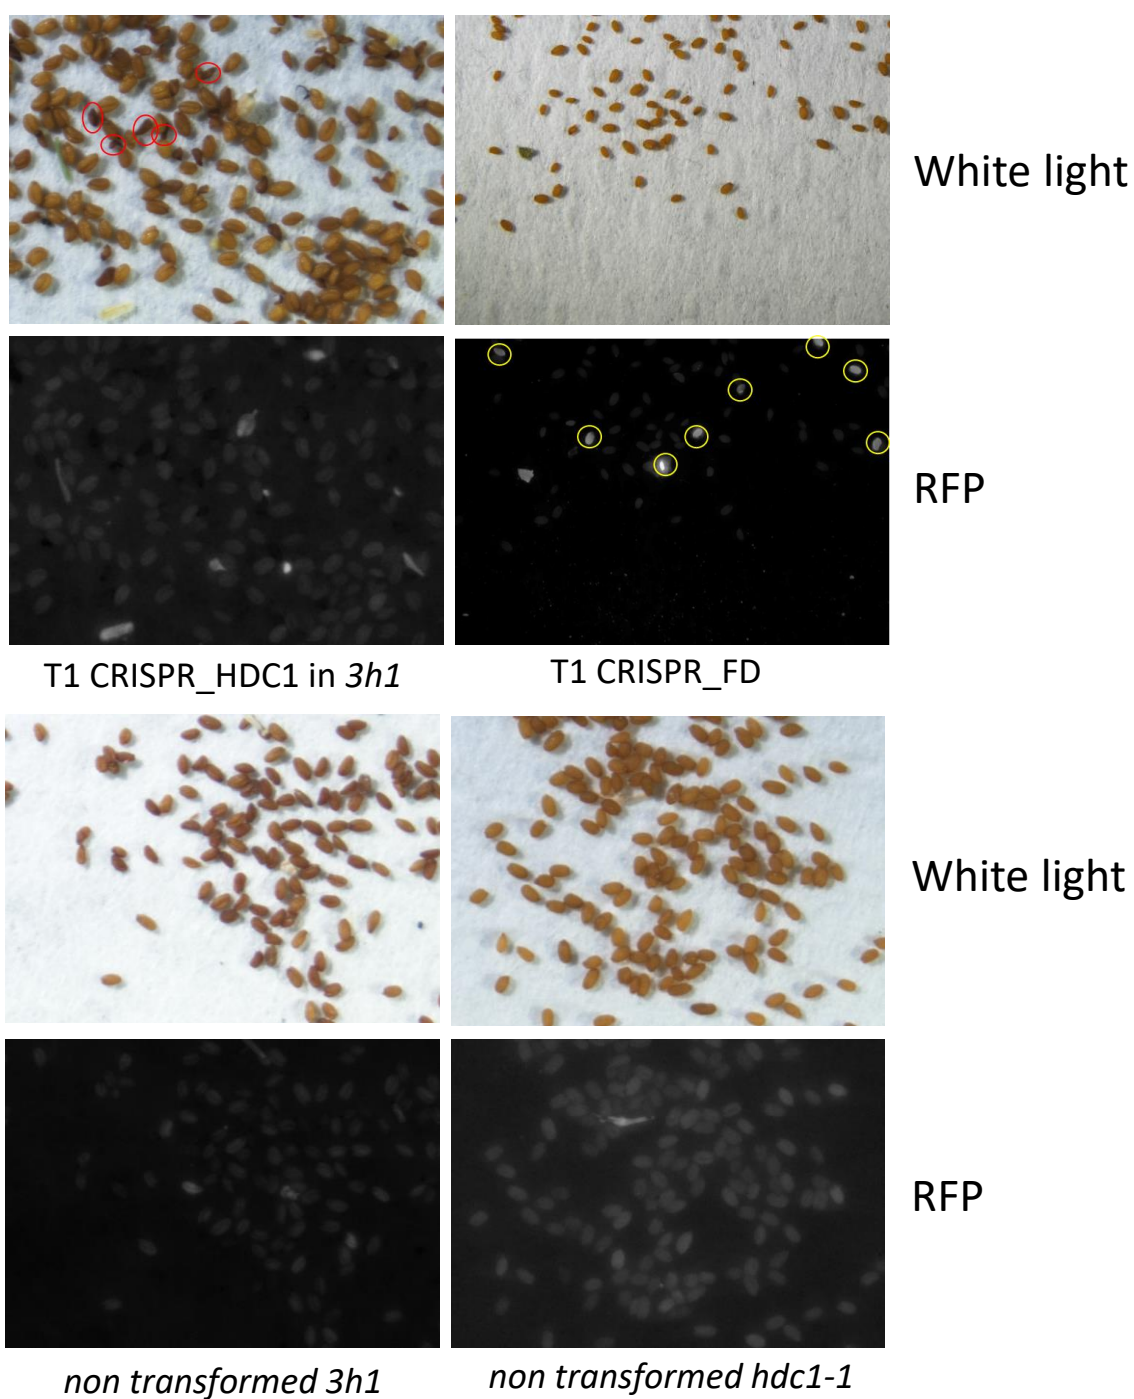

**Fig. S13: (A)** Siliques of wild type, *hdc1-1*, triple H1 (*3h1*) mutant, *h1.1* single mutant and putative quadruple and double mutants by crossing with *hdc1-1*. Red circles highlight aborted seeds within the siliques. **(B)** CRISPR Cas9 experiment to silence HDC1 in triple h1 (*3h1*) mutant. *3h1* plants were flower-dipped with a construct containing gRNAs that would knock-out HDC1. The construct also contains an RFP to allow screening for transformation based on fluorescence signal. Top left : Screening of T1 CRISPR\_HDC1 in *3h1* shows no transformed seeds in the pods (lack of RFP signal) for >1000 tested seeds. Instead, a significant number of aborted seeds are observed (36 aborted seeds, 22.3% of the total in the picture) indicating that any successful transformation was lethal. Examples of aborted seeds are shown in the red circle. Top right: Independent transformation with CRISPR\_FD showing the efficiency of transformation (see yellow-circled seeds). Bottom: Seeds of *3h1* and *hdc1-1* mutants showing no obvious aborted seeds.

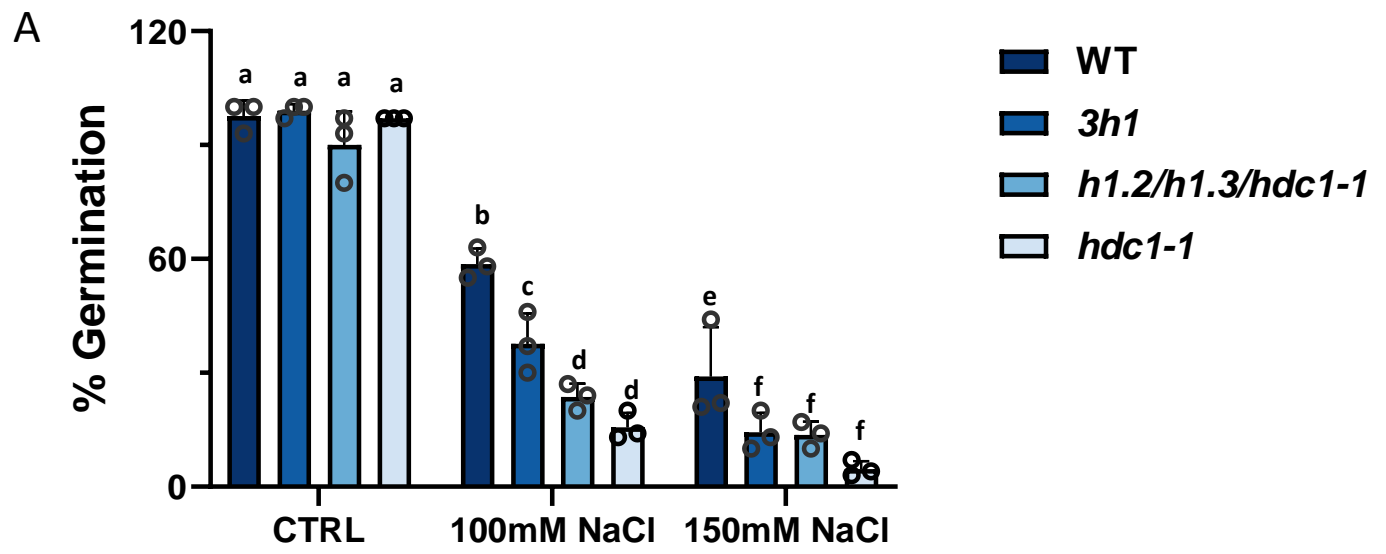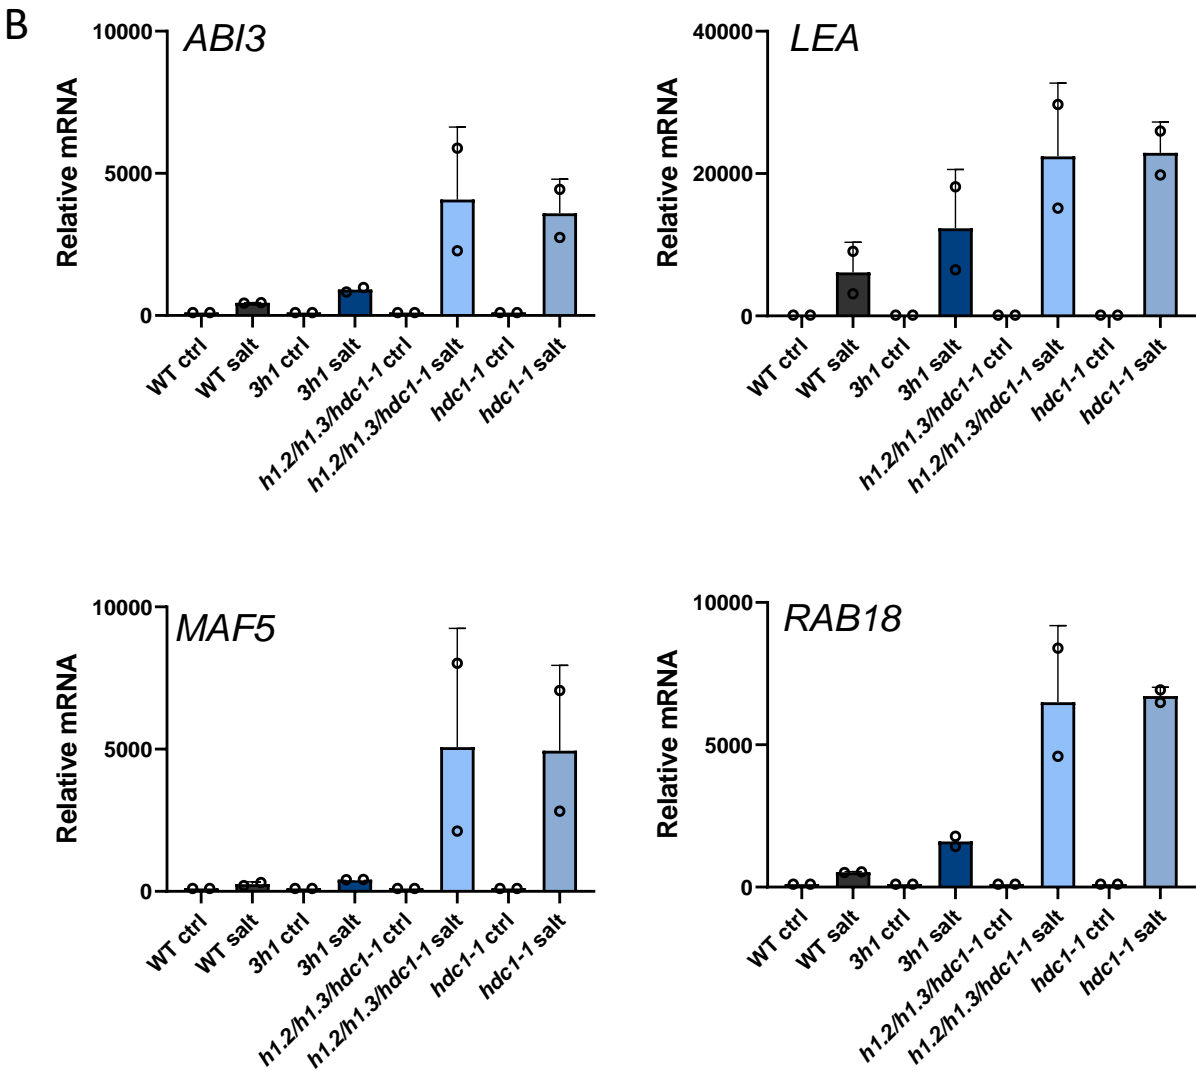

**Fig. S14 (A):** Germination rate of wild type (WT), knockout mutants of HDC1 and (*hdc1-1*), triple knockout mutant of histone-1 variants (*3h1*) and triple knock mutant of histone H1.2, H1.3 variants and HDC1 (*h1.2/h1.3/hdc1-1*) Letters indicate differences at  $p < 0.05$  (one-way ANOVA). **(B) :** mRNA levels of *ABI3*, *LEA*, *MAF5* and *RAB18* in 3-days old seedlings of wild type, *hdc1-1*, *3h1* and *h1.2/h1.3/hdc1-1* seedlings grown on control or salt media determined by qPCR and normalised to the housekeeping gene *ISUI* (AT4G22220). Bars are means of 2 experimental replicates  $\pm$  SD (reported above the bars).

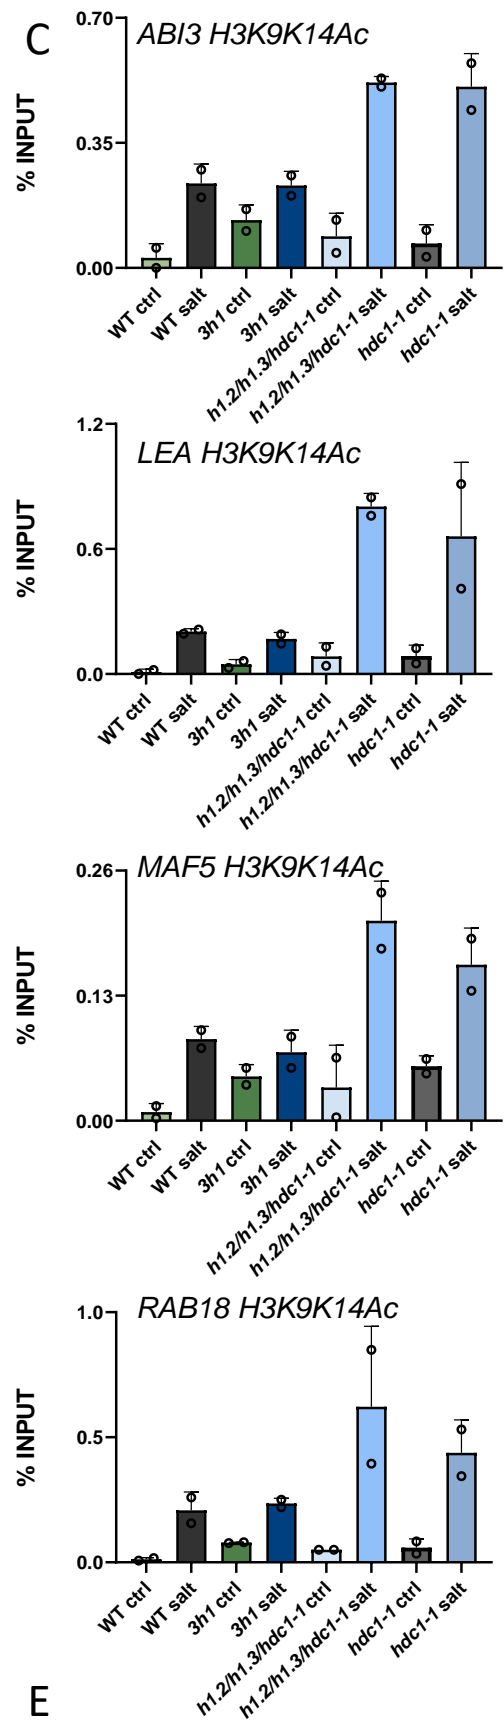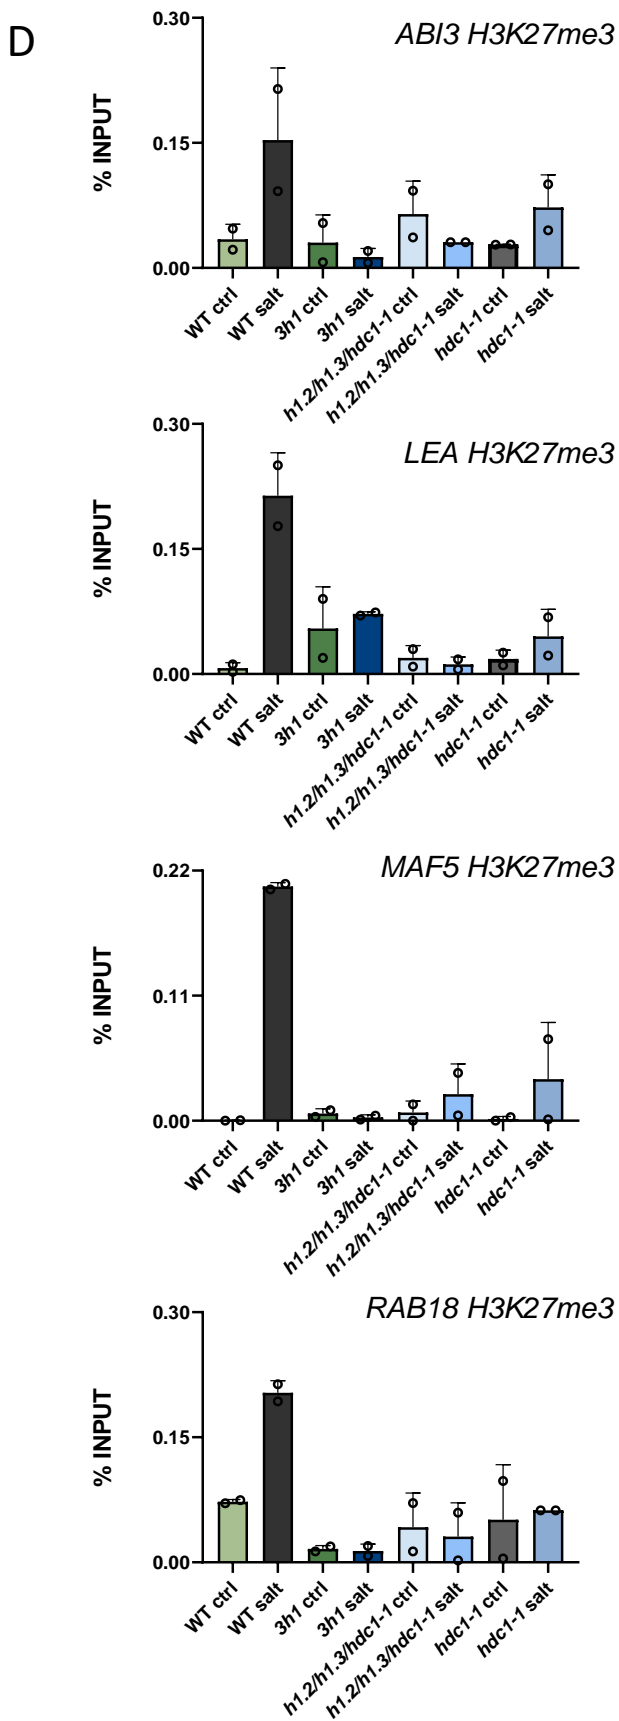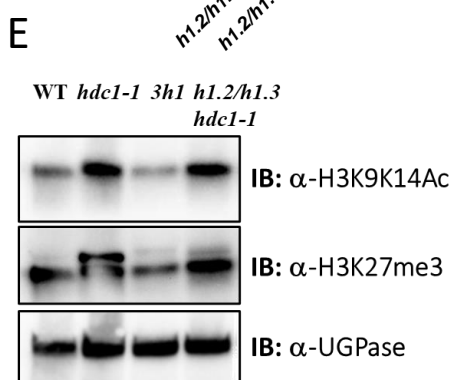

**(C):** H3K9K14Ac levels (in % of Input) of *ABI3*, *LEA*, *MAF5* and *RAB18* in wildtype (WT), *3h1*, *h1.2/h1.3/hdc1-1* and *hdc1-1* 3 days-old seedlings grown on control or salt media, determined by anti-H3K9K14Ac-ChIP qPCR. Bars are means of 2 experimental replicates  $\pm$  SD (reported above the bars). **(D):** H3K27me3 levels (in % of Input) of *ABI3*, *LEA*, *MAF5* and *RAB18* 3-days old seedlings of wildtype (WT), *3h1*, *h1.2/h1.3/hdc1-1* and *hdc1-1* grown on control or salt media, determined by anti-H3K27me3-ChIP qPCR. Bars are means of 2 experimental replicates  $\pm$  SD (reported above the bars). **(E):** Detection of acetylated (a-H3K9K14Ac) and methylated (H3K27me3) histone 3 (a-H3) in protein extracts of WT, *hdc1-1*, *3h1*, *h1.2/h1.3/hdc1-1*. Immunoblot with anti-UGPase was used as loading control.



*Primers for genotyping gDNA*

| <i>Amplicon</i> | <i>Forward Primer</i>        | <i>Reverse Primer</i>                                       |
|-----------------|------------------------------|-------------------------------------------------------------|
| <i>hdc1-1</i>   | CAAGGACTGGTGCTGAGAAAG        | GCAGCCAAAATCTCAAGTAGC                                       |
| <i>maf5</i>     | CGTTTACGTCTCTGGAAACG         | TGGGTTTCACCAGAAAGTGTG                                       |
| <i>lea</i>      | AAAAATGATCTGGCTGTGCAC        | ACGGTTTTATAGAAAAGGCGC                                       |
| <i>Lbb1-3</i>   | ATTTTGCCGATTTCGGAAC          | pairs with mutant flanking sequence reverse primer          |
| <i>PAC161</i>   | TGATCCATGTAGATTTCCCG         | pairs with GABI-KAT mutant flanking sequence reverse primer |
| <i>h1.1</i>     | TGAAAATCCCACGTTTATTGG        | GGGAGTTTAAACGAGGCTTTG                                       |
| <i>h1.2</i>     | TCTTTGGTCGGATTCAACAAC        | TTCTTAGTTCCTTTAGCCGCC                                       |
| <i>h1.3</i>     | GAAAACCACCACTCATCTCCATACTTCA | CCTTCTCACTTTCCTCTCTTTCTGTTTGTC                              |
| <i>Ds5-4_R</i>  | TACGATAACGGTCCGTACGG         | pairs with h1.3 primer                                      |

*Primers for RT-qPCR*

| <i>Amplicon</i> | <i>Forward Primer</i>  | <i>Reverse Primer</i>   |
|-----------------|------------------------|-------------------------|
| <i>AB13</i>     | TTCCTCAGCTGCTTCTTGGG   | GCACCAGAAGAGTCGTCACA    |
| <i>EIN3like</i> | CCGTTATCTCTTCGCCGTCA   | CCATTTTCTTGCGCCGTGAA    |
| <i>LEA</i>      | AGAAGTTCGGTAGCGGCAAA   | GTTATGGTGGCTGGAAGCT     |
| <i>MAF5</i>     | ACAGGGGATGAAAGAGCAGT   | ACTTGAGAAGCGGGAGAGTC    |
| <i>ISU</i>      | GCCATCGCTTCTCATCTGTTGC | TGGGAGAGAAAGATGCTTTG CG |
| <i>RAB18</i>    | GGAGAAGTTGCCAGGTCATC   | ACCGGGAAGCTTTTCCCTTGATC |
| <i>SAUR74</i>   | GCCAGGAGAGATCCACAAG    | ACGTCCAACCAACTGTCT      |

*Primers for ChIP qPCR*

| <i>Amplicon</i>    | <i>Forward Primer</i>    | <i>Reverse Primer</i>       |
|--------------------|--------------------------|-----------------------------|
| <i>AB13</i>        | TTCCTCAGCTGCTTCTTGGG     | GCACCAGAAGAGTCGTCACA        |
| <i>EIN3like</i>    | CCGTTATCTCTTCGCCGTCA     | CCATTTTCTTGCGCCGTGAA        |
| <i>LEA</i>         | CCGGTGTGTTAGCTCCACT      | CCAACGGTGTAGTAGGGTG         |
| <i>MAF5</i>        | AGGGATCGGCGTAGAGTTCT     | TGTCTCAAGATCCTGCCATGA       |
| <i>RAB18</i>       | CGTCTTACCAGAACCGTCCA     | CCGTATCCTCCTCCTCCAT         |
| <i>SAUR74</i>      | TGCTCATCTCTATCTCCCT      | TCACTAACCTGTCGCCTGTC        |
| <i>ACTIN</i>       | CGTTTCGCTTTCCTAGTGTAGCT  | AGCGAACGGATCTAGAGACTCACCTTG |
| <i>H3K9me2 1-1</i> | AAGAGAGCTGGCAGAAGCAGTTGA | ACGCCCTTTACCTTGACCTCCTTT    |
| <i>H3k9me2 1-2</i> | TGTGTGGAAGGGTCTGTGGACTT  | AACTTACATGTTTGCGGGCACGAG    |

*Primers for CRISPR-Cas9*

| <i>Amplicon</i>     | <i>Forward Primer</i>               | <i>Reverse Primer</i>              |
|---------------------|-------------------------------------|------------------------------------|
| <i>pK1trNA_Aarl</i> | TCACCTGCCCCATTGAACAAAGCACCAGTGGTCTA | TTCACCTGCCCCAAACTGCACCAGCCGGGAATCG |
| <i>gRNA HDC1 11</i> | ATTGAGGGTGAAGGAGCTACCGAG            | AAACCTCGGTAGCTCCTTACCCTT           |
| <i>gRNA HDC1 65</i> | ATTGCGACTGCAATGTGGACCCG             | AAACCGGGTCCACATTTGCAGTGC           |

*Primers for Bisulfite sequencing*

| <i>Amplicon</i> | <i>Forward Primer</i>         | <i>Reverse Primer</i>    |
|-----------------|-------------------------------|--------------------------|
| <i>LEA</i>      | GGTTTTAAGTTTTGATTAATTTATATGTG | TCCAATACCAACAAAATCCTATC  |
| <i>MAF5</i>     | GGTTTTGAGGGTTAGAATTTTGAATAAT  | CATAATCCAAAATCAACAAAATCC |

**Table S1:** Primer sequences used in this study.
